# Supplementary material for: Aging measures and cancer: Findings from the Health and Retirement Study
Source: bioRxiv or medRxiv preprint supplement (doi:10.1101/2023.09.20.23295845), 2023-09-23
Supplement: Supplementary file [file media-1.pdf]

Supplemental Table 1. Description of aging constructs

| Aging constructs                              | How was the aging construct created in published paper?                                                                                                                                                                                                                                                                                                         | Number of biomarkers       | Unit                                                     | Reference                   |
|-----------------------------------------------|-----------------------------------------------------------------------------------------------------------------------------------------------------------------------------------------------------------------------------------------------------------------------------------------------------------------------------------------------------------------|----------------------------|----------------------------------------------------------|-----------------------------|
| <b>SA</b>                                     | Participants responded to the question “How old do you feel?”                                                                                                                                                                                                                                                                                                   | NA                         | Years                                                    |                             |
| <b>Clinical marker-based aging constructs</b> |                                                                                                                                                                                                                                                                                                                                                                 |                            |                                                          |                             |
| <b>KDM-BA</b>                                 | Klemara Doubal algorithm was applied to train 10 fairly standard clinical markers in order to constructs KDM- BA. Those 10 markers, which were significantly correlated with age ( $r>0.1$ ) in the third National Health and Nutrition Examination Survey (NHANES III), were selected from a group of 21 biomarkers known to play a role in the aging process. | 10 clinical markers        | Years                                                    | Levine [2013] <sup>1</sup>  |
| <b>PhenoAge</b>                               | Cox penalized regression was applied to train clinical biomarkers and age against mortality.                                                                                                                                                                                                                                                                    | 9 clinical markers and age | Years                                                    | Levine [2018] <sup>2</sup>  |
| <b>Epigenetic clocks (ECs)</b>                |                                                                                                                                                                                                                                                                                                                                                                 |                            |                                                          |                             |
| <b>Hannum EC</b>                              | Elastic net regression combined with bootstrap approaches was applied to train DNA methylation (DNAm) sites, gender, and body mass index (BMI) against age. First generation EC.                                                                                                                                                                                | 71 CpGs                    | Years                                                    | Hannum [2013] <sup>3</sup>  |
| <b>Horvath EC</b>                             | Elastic net regression was applied to train DNAm sites against age. First generation EC.                                                                                                                                                                                                                                                                        | 353 CpGs                   | Years                                                    | Horvath [2013] <sup>4</sup> |
| <b>Levine EC</b>                              | Elastic net regression was applied to train DNAm sites against PhenoAge. Second generation EC.                                                                                                                                                                                                                                                                  | 513 CpGs                   | Years                                                    | Levine [2018] <sup>2</sup>  |
| <b>GrimAge</b>                                | Elastic net Cox regression was applied to train a DNAm-based composite constructs for seven plasma proteins, smoking pack-years, age and gender against mortality. Second generation EC.                                                                                                                                                                        | 1030 CpGs                  | Years                                                    | Lu [2019] <sup>5</sup>      |
| <b>POA</b>                                    | Elastic net regression was applied to train DNA methylation sites against the change in 18-biomarker Pace of Aging. Third generation EC.                                                                                                                                                                                                                        | 46 CpGs                    | Years of physiological decline per one chronological age | Belsky [2020] <sup>6</sup>  |

## References:

1. Levine ME. Modeling the rate of senescence: can estimated biological age predict mortality more accurately than chronological age? *J Gerontol A Biol Sci Med Sci*. Jun 2013;68(6):667-74. doi:10.1093/gerona/gls233
2. Levine ME, Lu AT, Quach A, et al. An epigenetic biomarker of aging for lifespan and healthspan. *Aging (Albany NY)*. 04 2018;10(4):573-591. doi:10.18632/aging.101414
3. Hannum G, Guinney J, Zhao L, et al. Genome-wide methylation profiles reveal quantitative views of human aging rates. *Mol Cell*. Jan 2013;49(2):359-367. doi:10.1016/j.molcel.2012.10.016
4. Horvath S. DNA methylation age of human tissues and cell types. *Genome Biol*. 2013;14(10):R115. doi:10.1186/gb-2013-14-10-r115
5. Lu AT, Quach A, Wilson JG, et al. DNA methylation GrimAge strongly predicts lifespan and healthspan. *Aging (Albany NY)*. 01 2019;11(2):303-327. doi:10.18632/aging.101684
6. Belsky DW, Caspi A, Arseneault L, et al. Quantification of the pace of biological aging in humans through a blood test, the DunedinPoAm DNA methylation algorithm. *Elife*. 05 2020;9doi:10.7554/eLife.54870
