# Supplementary material for: Aging measures and cancer: Findings from the Health and Retirement Study
Source: bioRxiv or medRxiv preprint supplement (doi:10.1101/2023.09.20.23295845), 2023-09-23
Supplement: Supplementary file [file media-2.pdf]

Supplemental Table 2a. Correlations across KDM-BA, PhenoAge, SA, and chronological age (CA) in Sample A<sup>a</sup>

|          | CA   | KDM-BA | PhenoAge | SA |
|----------|------|--------|----------|----|
| CA       | 1    |        |          |    |
| KDM-BA   | 0.92 | 1      |          |    |
| PhenoAge | 0.80 | 0.84   | 1        |    |
| SA       | 0.60 | 0.56   | 0.53     | 1  |

<sup>a</sup>Sample A includes 5,501 participants who had reported their SA and had biomarker measures used to calculate KDM-BA and PhenoAge.

Supplemental Table 2b. Correlations between age acceleration (abbreviated as Accel) for KDM-BA, PhenoAge, and SA and chronological age (CA) in Sample A<sup>a</sup>

|               | CA | KDM-BA-Accel | PhenoAgeAccel | SA-Accel |
|---------------|----|--------------|---------------|----------|
| CA            | 1  |              |               |          |
| KDM-BA-Accel  | 0  | 1            |               |          |
| PhenoAgeAccel | 0  | 0.42         | 1             |          |
| SA-Accel      | 0  | 0.04         | 0.09          | 1        |

<sup>a</sup>Sample A includes 5,501 participants who had reported their SA and had biomarker measures used to calculate KDM-BA and PhenoAge.
