# Supplementary material for: Aging measures and cancer: Findings from the Health and Retirement Study
Source: bioRxiv or medRxiv preprint supplement (doi:10.1101/2023.09.20.23295845), 2023-09-23
Supplement: Supplementary file [file media-3.pdf]

Supplemental Table 3a. Correlations between chronological age (CA) and ECs in Sample B<sup>a</sup>

| Aging constructs | CA   | Hannum EC | Horvath EC | Levine EC | GrimAge | POA |
|------------------|------|-----------|------------|-----------|---------|-----|
| CA               | 1    |           |            |           |         |     |
| Hannum EC        | 0.81 | 1         |            |           |         |     |
| Horvath EC       | 0.73 | 0.77      | 1          |           |         |     |
| Levine EC        | 0.73 | 0.75      | 0.65       | 1         |         |     |
| GrimAge          | 0.83 | 0.76      | 0.65       | 0.74      | 1       |     |
| POA              | 0.03 | 0.12      | 0.10       | 0.20      | 0.38    | 1   |

<sup>a</sup>Sample B includes 3,387 participants who had data on ECs.

Supplemental Table 3b. Correlations between CA and age acceleration (abbreviated as Accel) for ECs in Sample B<sup>a</sup>

| Aging constructs | CA   | HannumAccel | HorvathAccel | LevineAccel | GrimAgeAccel | POA <sup>b</sup> |
|------------------|------|-------------|--------------|-------------|--------------|------------------|
| CA               | 1    |             |              |             |              |                  |
| HannumAccel      | 0    | 1           |              |             |              |                  |
| HorvathAccel     | 0    | 0.43        | 1            |             |              |                  |
| LevineAccel      | 0    | 0.40        | 0.26         | 1           |              |                  |
| GrimAgeAccel     | 0    | 0.25        | 0.10         | 0.34        | 1            |                  |
| POA              | 0.03 | 0.16        | 0.12         | 0.25        | 0.63         | 1                |

<sup>a</sup>Sample B includes 3,387 participants who had data on ECs.

<sup>b</sup>We did not calculate age acceleration for POA because it was not correlated with CA.
