# Supplementary material for: Aging measures and cancer: Findings from the Health and Retirement Study
Source: bioRxiv or medRxiv preprint supplement (doi:10.1101/2023.09.20.23295845), 2023-09-23
Supplement: Supplementary file [file media-4.pdf]

Supplemental Table 4. Associations between aging constructs and cancer prevalence in 2016; cancer cases diagnosed within two years of blood collection were excluded, HRS

| <b>Sample A<sup>a</sup></b>                                               |                                      |                              |                                                   |                      |
|---------------------------------------------------------------------------|--------------------------------------|------------------------------|---------------------------------------------------|----------------------|
| Aging constructs                                                          | No. of cancer survivors <sup>b</sup> | No. of controls <sup>b</sup> | OR (95% CI) per 1 SD increase in aging constructs |                      |
|                                                                           |                                      |                              | Model 1 <sup>c</sup>                              | Model 2 <sup>d</sup> |
| KDM-BA-Accel (SD = 3.81 years)                                            | 845                                  | 4,461                        | 1.05 (0.95, 1.15)                                 | 1.00 (0.90, 1.11)    |
| PhenoAgeAccel (SD = 7.11 years)                                           |                                      |                              | 1.14 (1.04, 1.25)                                 | 1.08 (0.97, 1.19)    |
| SA-Accel (SD = 10.37 years)                                               |                                      |                              | 1.17 (1.08, 1.28)                                 | 1.14 (1.04, 1.24)    |
| <b>Sample B<sup>a</sup></b>                                               |                                      |                              |                                                   |                      |
| Aging constructs                                                          | No. of cancer survivors <sup>b</sup> | No. of controls <sup>b</sup> | OR (95% CI) per 1 SD increase in aging constructs |                      |
|                                                                           |                                      |                              | Model 1 <sup>c</sup>                              | Model 2 <sup>d</sup> |
| HannumAccel (SD = 5.20 years)                                             | 513                                  | 2,733                        | 1.24 (1.10, 1.39)                                 | 1.22 (1.09, 1.37)    |
| HorvathAccel (SD = 6.38 years)                                            |                                      |                              | 1.14 (0.99, 1.30)                                 | 1.12 (0.98, 1.28)    |
| LevineAccel (SD = 6.74 years)                                             |                                      |                              | 1.15 (1.03, 1.28)                                 | 1.12 (1.00, 1.26)    |
| GrimAgeAccel (SD = 4.65 years)                                            |                                      |                              | 1.23 (1.10, 1.39)                                 | 1.21 (1.05, 1.41)    |
| POA (SD = 0.09 years of physiological decline per one chronological year) |                                      |                              | 1.14 (0.99, 1.31)                                 | 1.11 (0.95, 1.29)    |

<sup>a</sup>Sample A includes participants who had measures of KDM-BA, PhenoAge, and SA. Sample B includes participants who data on ECs.

<sup>b</sup>Controls are participants without a history of cancer in 2016. Cancer survivors are participants with a history of cancer in 2016.

<sup>c</sup>Model 1 was adjusted for chronological age.

<sup>d</sup>Model 2 was adjusted for chronological age, sex, race/ethnicity, BMI, smoking status, comorbidity index, and CMV infection.
