# Supplementary material for: Aging measures and cancer: Findings from the Health and Retirement Study
Source: bioRxiv or medRxiv preprint supplement (doi:10.1101/2023.09.20.23295845), 2023-09-23
Supplement: Supplementary file [file media-6.pdf]

Supplemental Table 6. Associations between aging constructs and mortality in cancer survivors stratified by sex, HRS (2016-2020)

| <b>Sample A<sup>a</sup>: 946 cancer survivors</b> |                                                                      |                   |                   |
|---------------------------------------------------|----------------------------------------------------------------------|-------------------|-------------------|
|                                                   | <b>HR (95% CI)<sup>b</sup> per 1 SD increase in age acceleration</b> |                   |                   |
| Sex group                                         | KDM-BA-Accel                                                         | PhenoAgeAccel     | SA-Accel          |
| Female (59 deaths out of 511 survivors)           | 1.26 (0.96, 1.65)                                                    | 1.50 (1.12, 2.01) | 0.82 (0.52, 1.31) |
| Male (63 deaths out of 435 survivors)             | 1.06 (0.77, 1.50)                                                    | 1.54 (0.99, 2.40) | 0.92 (0.62, 1.38) |
| P-interaction                                     | 0.44                                                                 | 0.87              | 0.60              |
| <b>Sample B<sup>a</sup>: 582 cancer survivors</b> |                                                                      |                   |                   |
|                                                   | <b>HR (95% CI)<sup>b</sup> per 1 SD increase in age acceleration</b> |                   |                   |
| Sex group                                         | HannumAccel                                                          | HorvathAccel      | LevineAccel       |
| Female (48 deaths out of 314 survivors)           | 1.51 (1.26, 1.81)                                                    | 1.37 (1.01, 1.87) | 1.65 (1.35, 2.01) |
| Male (55 deaths out of 268 survivors)             | 1.12 (0.86, 1.45)                                                    | 1.09 (0.77, 1.53) | 1.55 (1.18, 2.03) |
| P-interaction                                     | 0.27                                                                 | 0.55              | 0.99              |
| Sex group                                         | GrimAgeAccel                                                         | POA               |                   |
| Female (48 deaths out of 314 survivors)           | 2.97 (2.21, 4.00)                                                    | 1.44 (1.00, 2.07) |                   |
| Male (55 deaths out of 268 survivors)             | 1.55 (1.03, 2.33)                                                    | 1.09 (0.77, 1.54) |                   |
| P-interaction                                     | 0.0017                                                               | 0.06              |                   |

<sup>a</sup>Sample A includes cancer survivors who had measures of KDM-BA, PhenoAge, and SA. Sample B includes cancer survivors who had data on ECs.

<sup>b</sup>The model was adjusted for chronological age, race/ethnicity, BMI, smoking status, comorbidity index, and CMV infection.
