# Supplementary material for: Aging measures and cancer: Findings from the Health and Retirement Study
Source: bioRxiv or medRxiv preprint supplement (doi:10.1101/2023.09.20.23295845), 2023-09-23
Supplement: Supplementary file [file media-7.pdf]

Supplemental Table 7. Associations between aging constructs and mortality in cancer survivors stratified by time since cancer diagnosis, HRS (2016-2020)

| <b>Sample A: 941 cancer survivors (5 survivors were excluded due to missing time of cancer diagnosis)</b> |                                                                      |                   |                    |
|-----------------------------------------------------------------------------------------------------------|----------------------------------------------------------------------|-------------------|--------------------|
|                                                                                                           | <b>HR (95% CI)<sup>b</sup> per 1 SD increase in age acceleration</b> |                   |                    |
| Time since cancer diagnosis                                                                               | KDM-BA-Accel                                                         | PhenoAgeAccel     | SA-Accel           |
| <2 years (14 deaths out of 95 survivors)                                                                  | 1.35 (0.80, 2.31)                                                    | 1.63 (0.79, 3.37) | 1.07 (0.56, 2.09)  |
| 2-5 years (25 deaths out of 162 survivors)                                                                | 1.02 (0.70, 1.46)                                                    | 1.90 (1.07, 3.38) | 0.91 (0.49, 1.71)  |
| >5 years (83 deaths out of 683 survivors)                                                                 | 1.09 (0.88, 1.35)                                                    | 1.34 (0.96, 1.86) | 0.89 (0.62, 1.27)  |
| <b>Sample B: 577 cancer survivors (5 survivors were excluded due to missing time of cancer diagnosis)</b> |                                                                      |                   |                    |
|                                                                                                           | <b>HR (95% CI)<sup>b</sup> per 1 SD increase in age acceleration</b> |                   |                    |
| Time since cancer diagnosis                                                                               | HannumAccel                                                          | HorvathAccel      | LevineAccel        |
| <2 years (15 deaths out of 64 survivors)                                                                  | 1.33 (0.94, 1.86)                                                    | 1.17 (0.88, 1.54) | 3.84 (1.28, 11.54) |
| 2-5 years (15 deaths out of 110 survivors)                                                                | 1.32 (0.81, 2.61)                                                    | 1.52 (0.98, 2.36) | 2.41 (0.97, 6.01)  |
| >5 years (73 deaths out of 403 survivors)                                                                 | 1.48 (1.14, 1.93)                                                    | 1.23 (0.93, 1.61) | 1.49 (1.21, 1.82)  |
| Time since cancer diagnosis                                                                               | GrimAgeAccel                                                         | POA               |                    |
| <2 years (15 deaths out of 64 survivors)                                                                  | 2.77 (1.98, 3.89)                                                    | 1.93 (1.49, 2.51) |                    |
| 2-5 years (15 deaths out of 110 survivors)                                                                | 3.08 (1.34, 7.07)                                                    | 1.72 (0.35, 8.37) |                    |
| >5 years (73 deaths out of 403 survivors)                                                                 | 2.04 (1.30, 3.18)                                                    | 1.10 (0.77, 1.58) |                    |

<sup>a</sup>Sample A includes cancer survivors who had measures of KDM-BA, PhenoAge, and SA. Sample B includes cancer survivors who had data on ECs.

<sup>b</sup>The model was adjusted for chronological age, sex, race/ethnicity, BMI, smoking status, comorbidity index, and CMV infection.
