# Supplementary material for: Aging measures and cancer: Findings from the Health and Retirement Study
Source: bioRxiv or medRxiv preprint supplement (doi:10.1101/2023.09.20.23295845), 2023-09-23
Supplement: Supplementary file [file media-8.pdf]

Supplemental Table 8. Association between aging constructs and risk of total cancer, HRS (2016-2020)

| <b>Sample A: 4,413 participants without a history of cancer in 2016<sup>a</sup></b> |                     |                    |                                                   |                      |
|-------------------------------------------------------------------------------------|---------------------|--------------------|---------------------------------------------------|----------------------|
| Aging constructs                                                                    | No. of cancer cases | Total person-years | HR (95% CI) per 1 SD increase in aging constructs |                      |
|                                                                                     |                     |                    | Model 1 <sup>b</sup>                              | Model 2 <sup>c</sup> |
| KDM-BA-Accel (SD = 3.76 years)                                                      |                     |                    | 1.05 (0.89, 1.23)                                 | 1.00 (0.84, 1.20)    |
| PhenoAgeAccel (SD = 7.07 years)                                                     | 182                 | 17,405             | 1.06 (0.88, 1.28)                                 | 0.95 (0.76, 1.18)    |
| SA-Accel (SD = 10.35 years)                                                         |                     |                    | 1.00 (0.82, 1.22)                                 | 0.98 (0.82, 1.16)    |
| <b>Sample B: 2,688 respondents without a history of cancer in 2016<sup>a</sup></b>  |                     |                    |                                                   |                      |
| Aging constructs                                                                    | No. of cancer cases | Total person-years | HR (95% CI) per 1 SD increase in aging constructs |                      |
|                                                                                     |                     |                    | Model 1 <sup>b</sup>                              | Model 2 <sup>c</sup> |
| HannumAccel (SD = 5.13 years)                                                       |                     |                    | 1.15 (0.95, 1.40)                                 | 1.12 (0.90, 1.40)    |
| HorvathAccel (SD = 6.26 years)                                                      |                     |                    | 1.06 (0.88, 1.29)                                 | 1.04 (0.87, 1.26)    |
| LevineAccel (SD = 6.77 years)                                                       |                     |                    | 1.07 (0.86, 1.33)                                 | 1.05 (0.83, 1.32)    |
| GrimAgeAccel (SD = 4.64 years)                                                      | 122                 | 10,366             | 1.19 (0.98, 1.45)                                 | 1.09 (0.81, 1.45)    |
| POA (SD = 0.09 years of physiological decline per one chronological year)           |                     |                    | 1.23 (0.99, 1.03)                                 | 1.14 (0.81, 1.59)    |

<sup>a</sup>Sample A includes 4,413 participants who had measures of KDM-BA, PhenoAge, and SA. Sample B includes 2,688 participants who had data on ECs. Participants with a prevalent cancer in 2016 and with missing cancer status after 2016 or missing cancer diagnosis time were excluded.

<sup>b</sup>Model 1 was adjusted for chronological age.

<sup>c</sup>Model 2 was adjusted for chronological age, sex, race/ethnicity, BMI, smoking status, comorbidity index, and CMV infection.
