# Supplementary material for: Aging measures and cancer: Findings from the Health and Retirement Study
Source: bioRxiv or medRxiv preprint supplement (doi:10.1101/2023.09.20.23295845), 2023-09-23
Supplement: Supplementary file [file media-10.pdf]

Supplemental Table 10. Association between aging constructs and mortality among cancer survivors<sup>a</sup> and controls<sup>a</sup>; putting eight aging constructs in a single model, HRS (2016-2020)

| <i>Cancer survivors (N = 410)</i> |                                                        |
|-----------------------------------|--------------------------------------------------------|
| Aging constructs                  | HR (95% CI) <sup>b</sup> per 1 SD for aging constructs |
| KDM-BA-Accel                      | 1.24 (0.83, 1.86)                                      |
| PhenoAgeAccel                     | 1.34 (0.97, 1.85)                                      |
| SA-Accel                          | 0.88 (0.51, 1.52)                                      |
| HannumAccel                       | 1.15 (0.86, 1.47)                                      |
| HorvathAccel                      | 1.16 (0.86, 1.56)                                      |
| LevineAccel                       | 1.41 (1.07, 1.87)                                      |
| GrimAgeAccel                      | 1.96 (1.09, 3.53)                                      |
| POA                               | 0.77 (0.50, 1.21)                                      |
| <i>Controls (N = 2003)</i>        |                                                        |
| Aging constructs                  | HR (95% CI) <sup>b</sup> per 1 SD for aging constructs |
| KDM-BA-Accel                      | 1.07 (1.02, 1.13)                                      |
| PhenoAgeAccel                     | 1.01 (0.98, 1.04)                                      |
| SA-Accel                          | 1.01 (0.97, 1.04)                                      |
| HannumAccel                       | 1.01 (0.95, 1.07)                                      |
| HorvathAccel                      | 1.01 (0.95, 1.07)                                      |
| LevineAccel                       | 1.04 (0.99, 1.09)                                      |
| GrimAgeAccel                      | 1.02 (0.95, 1.08)                                      |
| POA                               | 6.49 (0.81, 52.53)                                     |

<sup>a</sup>Cancer survivors and controls who were in both Sample A and Sample B had data on all aging constructs.

<sup>b</sup>The model was adjusted for chronological age, race/ethnicity, BMI, smoking status, comorbidity index, and CMV infection.
